# Supplementary material for: River bank burrowing is innate in native and invasive signal crayfish (Pacifastacus leniusculus) and is driven by biotic and abiotic cues
Source: Springer Nature journal article supplement (doi:10.1007/s10530-023-03115-2), 2023-06-28
Supplement: MOESM1 [file 10530_2023_3115_MOESM1_ESM.docx]

Crayfish were trapped under UK Environment Agency Trapper Number EW071-E-738.

Crayfish were maintained under license number E C ILFA 62 v2.
