# Supplementary material for: River bank burrowing is innate in native and invasive signal crayfish (Pacifastacus leniusculus) and is driven by biotic and abiotic cues
Source: Springer Nature journal article supplement (doi:10.1007/s10530-023-03115-2), 2023-06-28
Supplement: MOESM2 [file 10530_2023_3115_MOESM2_ESM.xlsx]

## Sheet: Data by mesocosm
Run ID	Experiment Year	River	Population	C1Sex	C1Size	C2Sex	C2Size	C3Sex	C3Size	C4Sex	C4Size	MeanSex	MeanSize	TreatmentCode	Shelter	Crayfish Density	NoOfBurrows	Volume	Mass	Mass per crayfish
1	2018	Gaddesby	IEB	1	50							1	50	1	None	Low	0	0	0	0
2	2018	Gaddesby	IEB	2	54							2	54	1	None	Low	1	38.8575	54.7891	54.7891
3	2018	Gaddesby	IEB	2	47							2	47	1	None	Low	1	310.86	438.313	438.313
4	2018	Gaddesby	IEB	1	41							1	41	1	None	Low	0	0	0	0
5	2018	Gaddesby	IEB	2	54							2	54	1	None	Low	0	0	0	0
6	2018	Gaddesby	IEB	2	51							2	51	1	None	Low	0	0	0	0
7	2018	Gaddesby	IEB	1	49							1	49	1	None	Low	0	0	0	0
8	2018	Gaddesby	IEB	1	50							1	50	2	Rock	Low	0	0	0	0
9	2018	Gaddesby	IEB	1	59							1	59	2	Rock	Low	0	0	0	0
10	2018	Gaddesby	IEB	1	53							1	53	2	Rock	Low	0	0	0	0
11	2018	Gaddesby	IEB	2	54							2	54	2	Rock	Low	0	0	0	0
12	2018	Gaddesby	IEB	2	44							2	44	2	Rock	Low	0	0	0	0
13	2018	Gaddesby	IEB	2	51							2	51	2	Rock	Low	0	0	0	0
14	2018	Gaddesby	IEB	2	60							2	60	2	Rock	Low	0	0	0	0
15	2018	Gaddesby	IEB	2	51							2	51	3	Silt	Low	1	659.4	929.754	929.754
16	2018	Gaddesby	IEB	2	46							2	46	3	Silt	Low	0	0	0	0
17	2018	Gaddesby	IEB	2	47							2	47	3	Silt	Low	0	0	0	0
18	2018	Gaddesby	IEB	1	50							1	50	3	Silt	Low	0	0	0	0
19	2018	Gaddesby	IEB	2	53							2	53	3	Silt	Low	0	0	0	0
20	2018	Gaddesby	IEB	2	47							2	47	3	Silt	Low	0	0	0	0
21	2019	Gaddesby	IEB	1	63							1	63	3	Silt	Low	0	0	0	0
22	2018	Gaddesby	IEB	2	47	1	43					1.5	45	5	None	Medium	1	215.875	304.384	152.192
23	2018	Gaddesby	IEB	2	44	2	49					2	46.5	5	None	Medium	1	111.862	157.726	78.8631
24	2018	Gaddesby	IEB	2	41	1	46					1.5	43.5	5	None	Medium	2	155.43	219.156	109.578
25	2018	Gaddesby	IEB	1	55	1	52					1	53.5	5	None	Medium	0	0	0	0
26	2018	Gaddesby	IEB	2	60	2	53					2	56.5	5	None	Medium	0	0	0	0
27	2019	Gaddesby	IEB	1	41	2	46					1.5	43.5	5	None	Medium	0	0	0	0
28	2019	Gaddesby	IEB	1	41	2	46					1.5	43.5	5	None	Medium	0	0	0	0
29	2018	Gaddesby	IEB	2	51	1	49	1	41	2	50	1.5	47.75	6	None	High	1	35.325	49.8083	12.4521
30	2018	Gaddesby	IEB	2	46	2	48	1	49	2	53	1.75	49	6	None	High	1	0	0	0
31	2019	Gaddesby	IEB	1	59	2	52	2	46	1	43	1.5	50	6	None	High	3	733.975	1034.9	258.726
32	2019	Gaddesby	IEB	1	54	1	59	1	57	2	57	1.25	56.75	6	None	High	0	0	0	0
33	2019	Gaddesby	IEB	2	46	1	68	1	53	1	45	1.25	53	6	None	High	1	282.6	398.466	99.6165
34	2019	Gaddesby	IEB	1	58	1	54	2	47	1	45	1.25	51	6	None	High	0	0	0	0
35	2019	Gaddesby	IEB	1	58	1	54	2	47	1	45	1.25	51	6	None	High	0	0	0	0
36	2018	Gaddesby	IEB	2	53	2	51					2	52	7	Rock	Medium	1	229.613	323.754	161.877
37	2018	Gaddesby	IEB	2	54	1	47					1.5	50.5	7	Rock	Medium	1	157	221.37	110.685
38	2018	Gaddesby	IEB	2	48	1	55					1.5	51.5	7	Rock	Medium	0	0	0	0
39	2018	Gaddesby	IEB	2	47	2	60					2	53.5	7	Rock	Medium	0	0	0	0
40	2018	Gaddesby	IEB	2	51	2	40					2	45.5	7	Rock	Medium	1	188.4	265.644	132.822
41	2018	Gaddesby	IEB	1	50	1	48					1	49	7	Rock	Medium	1	176.625	249.041	124.521
42	2019	Gaddesby	IEB	1	56	1	52					1	54	7	Rock	Medium	0	0	0	0
43	2018	Gaddesby	IEB	2	40	2	44	1	50	2	47	1.75	45.25	8	Rock	High	3	671.175	946.357	236.589
44	2018	Gaddesby	IEB	1	53	1	56	2	51	2	49	1.5	52.25	8	Rock	High	2	250.415	353.085	88.2713
45	2019	Gaddesby	IEB	1	54	2	56	1	43	1	57	1.25	52.5	8	Rock	High	1	961.625	1355.89	338.973
46	2019	Gaddesby	IEB	2	46	2	46	1	41	2	51	1.75	46	8	Rock	High	1	392.5	553.425	138.356
47	2019	Gaddesby	IEB	1	56	2	56	1	54	1	60	1.25	56.5	8	Rock	High	0	0	0	0
48	2019	Gaddesby	IEB	2	47	2	51	1	43	1	43	1.5	46	8	Rock	High	1	357.175	503.617	125.904
49	2019	Gaddesby	IEB	2	55	1	55	2	58	1	56	1.5	56	8	Rock	High	0	0	0	0
50	2018	Etherow	IEX	2	56							2	56	1	None	Low	2	1347.06	1899.35	1899.35
51	2018	Etherow	IEX	1	57							1	57	1	None	Low	1	1186.92	1673.56	1673.56
52	2018	Etherow	IEX	1	46							1	46	1	None	Low	0	0	0	0
53	2018	Etherow	IEX	1	65							1	65	1	None	Low	1	188.4	265.644	265.644
54	2018	Etherow	IEX	1	54							1	54	1	None	Low	0	0	0	0
55	2018	Etherow	IEX	1	53							1	53	1	None	Low	1	320.28	451.595	451.595
56	2018	Etherow	IEX	1	40							1	40	1	None	Low	0	0	0	0
57	2018	Etherow	IEX	1	55							1	55	2	Rock	Low	0	0	0	0
58	2018	Etherow	IEX	2	47							2	47	2	Rock	Low	0	0	0	0
59	2018	Etherow	IEX	1	60							1	60	2	Rock	Low	0	0	0	0
60	2018	Etherow	IEX	1	43							1	43	2	Rock	Low	0	0	0	0
61	2018	Etherow	IEX	1	42							1	42	2	Rock	Low	0	0	0	0
62	2018	Etherow	IEX	1	64							1	64	2	Rock	Low	0	0	0	0
63	2018	Etherow	IEX	1	52							1	52	2	Rock	Low	0	0	0	0
64	2018	Etherow	IEX	1	63							1	63	3	Silt	Low	0	0	0	0
65	2018	Etherow	IEX	1	60							1	60	3	Silt	Low	0	0	0	0
66	2018	Etherow	IEX	1	54							1	54	3	Silt	Low	0	0	0	0
67	2018	Etherow	IEX	2	47							2	47	3	Silt	Low	0	0	0	0
68	2018	Etherow	IEX	1	41							1	41	3	Silt	Low	0	0	0	0
69	2019	Etherow	IEX	1	39							1	39	3	Silt	Low	1	207.24	292.208	292.208
70	2019	Etherow	IEX	1	40							1	40	3	Silt	Low	0	0	0	0
71	2018	Etherow	IEX	1	63	1	61					1	62	5	None	Medium	0	0	0	0
72	2018	Etherow	IEX	2	48	1	51					1.5	49.5	5	None	Medium	2	340.69	480.373	240.186
73	2018	Etherow	IEX	1	43	1	41					1	42	5	None	Medium	2	270.04	380.756	190.378
74	2018	Etherow	IEX	1	37	1	44					1	40.5	5	None	Medium	0	0	0	0
75	2018	Etherow	IEX	1	60	1	55					1	57.5	5	None	Medium	0	0	0	0
76	2019	Etherow	IEX	2	43	2	43					2	43	5	None	Medium	1	105.975	149.425	74.7124
77	2019	Etherow	IEX	1	48	1	51					1	49.5	5	None	Medium	0	0	0	0
78	2019	Etherow	IEX	2	47	2	47	2	44	2	47	2	46.25	6	None	High	0	0	0	0
79	2019	Etherow	IEX	1	52	2	52	1	59	2	54	1.5	54.25	6	None	High	1	379.155	534.609	133.652
80	2019	Etherow	IEX	2	45	2	44	1	48	2	42	1.75	44.75	6	None	High	1	376.8	531.288	132.822
81	2019	Etherow	IEX	2	43	2	54	2	44	2	41	2	45.5	6	None	High	3	2929.62	4130.76	1032.69
82	2019	Etherow	IEX	1	54	2	53	2	51	2	54	1.75	53	6	None	High	2	596.6	841.206	210.302
83	2019	Etherow	IEX	2	54	2	41	2	54	2	47	2	49	6	None	High	1	1211.65	1708.42	427.106
84	2019	Etherow	IEX	1	56	2	53	2	47	2	46	1.75	50.5	6	None	High	1	317.925	448.274	112.069
85	2018	Etherow	IEX	1	42	1	44					1	43	7	Rock	Medium	0	0	0	0
86	2018	Etherow	IEX	1	60	2	48					1.5	54	7	Rock	Medium	1	141.3	199.233	99.6165
87	2018	Etherow	IEX	1	63	1	55					1	59	7	Rock	Medium	2	306.543	432.225	216.112
88	2018	Etherow	IEX	1	42	1	37					1	39.5	7	Rock	Medium	2	321.163	452.84	226.42
89	2019	Etherow	IEX	2	47	2	59					2	53	7	Rock	Medium	3	639.481	901.668	450.834
90	2019	Etherow	IEX	2	47	2	38					2	42.5	7	Rock	Medium	2	818.755	1154.44	577.222
91	2019	Etherow	IEX	2	41	1	41					1.5	41	7	Rock	Medium	0	0	0	0
92	2019	Etherow	IEX	1	56	1	53	1	52	2	53	1.25	53.5	8	Rock	High	0	0	0	0
93	2019	Etherow	IEX	2	45	2	47	2	42	2	44	2	44.5	8	Rock	High	2	325.873	459.481	114.87
94	2019	Etherow	IEX	2	46	1	51	2	44	2	44	1.75	46.25	8	Rock	High	1	459.225	647.507	161.877
95	2019	Etherow	IEX	2	43	2	43	2	51	2	47	2	46	8	Rock	High	2	1534.67	2163.89	540.973
96	2019	Etherow	IEX	2	47	2	51	2	53	2	43	2	48.5	8	Rock	High	3	345.498	487.152	121.788
97	2019	Etherow	IEX	2	65	2	44	2	53	2	48	2	52.5	8	Rock	High	1	1000.88	1411.23	352.808
98	2019	Etherow	IEX	2	41	2	44	2	45	1	53	1.75	45.75	8	Rock	High	3	528.894	745.74	186.435
99	2018	Gallatin	IRX	1	41.9							1	41.9	1	None	Low	1	599.544	845.357	845.357
100	2018	Gallatin	IRX	1	39.8							1	39.8	1	None	Low	1	689.721	972.506	972.506
101	2018	Gallatin	IRX	1	44.3							1	44.3	1	None	Low	2	1361.98	1920.38	1920.38
102	2018	Gallatin	IRX	1	59.6							1	59.6	1	None	Low	1	529.875	747.124	747.124
103	2018	Gallatin	IRX	1	56.4							1	56.4	1	None	Low	1	671.175	946.357	946.357
104	2018	Gallatin	IRX	1	44.3							1	44.3	1	None	Low	1	1102.14	1554.02	1554.02
105	2018	Gallatin	IRX	1	58							1	58	1	None	Low	0	0	0	0
106	2018	Gallatin	IRX	1	64.1							1	64.1	2	Rock	Low	0	0	0	0
107	2018	Gallatin	IRX	1	56							1	56	2	Rock	Low	0	0	0	0
108	2018	Gallatin	IRX	2	61.5							2	61.5	2	Rock	Low	0	0	0	0
109	2018	Gallatin	IRX	1	53.2							1	53.2	2	Rock	Low	1	266.606	375.914	375.914
110	2018	Gallatin	IRX	1	63.7							1	63.7	2	Rock	Low	0	0	0	0
111	2018	Gallatin	IRX	1	44.3							1	44.3	2	Rock	Low	0	0	0	0
112	2018	Gallatin	IRX	1	53.4							1	53.4	2	Rock	Low	0	0	0	0
113	2018	Gallatin	IRX	1	43							1	43	3	Silt	Low	1	1589.43	2241.09	2241.09
114	2018	Gallatin	IRX	1	44							1	44	3	Silt	Low	1	1334.5	1881.64	1881.64
115	2018	Gallatin	IRX	2	36							2	36	3	Silt	Low	1	89.49	126.181	126.181
116	2018	Gallatin	IRX	2	28							2	28	3	Silt	Low	1	941.215	1327.11	1327.11
117	2018	Gallatin	IRX	1	43	1	41					1	42	7	Rock	Medium	0	0	0	0
118	2018	Gallatin	IRX	2	36	1	29					1.5	32.5	7	Rock	Medium	2	916.684	1292.52	646.262
119	2018	Gallatin	IRX	2	45	1	59					1.5	52	7	Rock	Medium	0	0	0	0
120	2018	Gallatin	IRX	1	30	2	31					1.5	30.5	7	Rock	Medium	0	0	0	0
121	2018	Clark Fork	NX	2	38.8							2	38.8	1	None	Low	1	414.48	584.417	584.417
122	2018	Clark Fork	NX	1	49.8							1	49.8	1	None	Low	0	0	0	0
123	2018	Clark Fork	NX	1	48.2							1	48.2	1	None	Low	1	220.193	310.471	310.471
124	2018	Clark Fork	NX	1	58.7							1	58.7	1	None	Low	0	0	0	0
125	2018	Clark Fork	NX	2	37.4							2	37.4	1	None	Low	0	0	0	0
126	2018	Clark Fork	NX	1	39.1							1	39.1	1	None	Low	1	157.981	222.754	222.754
127	2018	Clark Fork	NX	2	39.2							2	39.2	1	None	Low	1	223.431	315.037	315.037
128	2018	Clark Fork	NX	1	58.4							1	58.4	2	Rock	Low	0	0	0	0
129	2018	Clark Fork	NX	2	41.7							2	41.7	2	Rock	Low	0	0	0	0
130	2018	Clark Fork	NX	1	48.2							1	48.2	2	Rock	Low	0	0	0	0
131	2018	Clark Fork	NX	2	35.3							2	35.3	2	Rock	Low	0	0	0	0
132	2018	Clark Fork	NX	2	38.9							2	38.9	2	Rock	Low	0	0	0	0
133	2018	Clark Fork	NX	1	58.4							1	58.4	2	Rock	Low	0	0	0	0
134	2018	Clark Fork	NX	2	38.9							2	38.9	2	Rock	Low	0	0	0	0
135	2018	Clark Fork	NX	1	43.1							1	43.1	3	Silt	Low	0	0	0	0
136	2018	Clark Fork	NX	2	45.2							2	45.2	3	Silt	Low	1	370.226	522.018	522.018
137	2018	Clark Fork	NX	1	40.6							1	40.6	3	Silt	Low	0	0	0	0
138	2018	Clark Fork	NX	2	33.6							2	33.6	3	Silt	Low	0	0	0	0
139	2018	Clark Fork	NX	1	48.8							1	48.8	3	Silt	Low	0	0	0	0
140	2018	Clark Fork	NX	1	49							1	49	3	Silt	Low	0	0	0	0
141	2018	Clark Fork	NX	2	45							2	45	3	Silt	Low	0	0	0	0
142	2018	Clark Fork	NX	2	39.4	2	37.8					2	38.6	5	None	Medium	1	375.623	529.628	264.814
143	2018	Clark Fork	NX	1	39.2	1	39.8					1	39.5	5	None	Medium	1	140.123	197.573	98.7864
144	2018	Clark Fork	NX	2	36.3	2	37.4					2	36.85	5	None	Medium	1	408.004	575.285	287.643
145	2018	Clark Fork	NX	2	35.3	2	38.9					2	37.1	5	None	Medium	1	105.975	149.425	74.7124
146	2018	Clark Fork	NX	2	39.6	2	37.2					2	38.4	5	None	Medium	1	120.203	169.486	84.7432
147	2018	Clark Fork	NX	2	34	2	32					2	33	5	None	Medium	1	65.94	92.9754	46.4877
148	2018	Clark Fork	NX	2	30	2	36					2	33	5	None	Medium	2	671.175	946.357	473.178
149	2018	Clark Fork	NX	2	46	1	34	1	36	2	34	1.5	37.5	6	None	High	2	365.025	514.685	128.671
150	2018	Clark Fork	NX	2	32	1	32	2	30	2	30	1.75	31	6	None	High	0	0	0	0
151	2018	Clark Fork	NX	1	30	2	32	1	30	2	30	1.5	30.5	6	None	High	1	292.02	411.748	102.937
152	2018	Clark Fork	NX	1	43.3	1	43.8					1	43.55	7	Rock	Medium	1	1080.95	1524.13	762.066
153	2018	Clark Fork	NX	2	39.1	2	36					2	37.55	7	Rock	Medium	1	53.5763	75.5425	37.7713
154	2018	Clark Fork	NX	2	41.9	2	38.7					2	40.3	7	Rock	Medium	1	453.73	639.759	319.88
155	2018	Clark Fork	NX	1	36.6	1	31.3					1	33.95	7	Rock	Medium	0	0	0	0
156	2018	Clark Fork	NX	2	37.8	2	45					2	41.4	7	Rock	Medium	1	127.562	179.863	89.9316
157	2018	Clark Fork	NX	2	30	2	31.9					2	30.95	7	Rock	Medium	1	33.5588	47.3178	23.6589
158	2018	Clark Fork	NX	1	30.2	1	31.9					1	31.05	7	Rock	Medium	1	113.04	159.386	79.6932
159	2018	Clark Fork	NX	1	31	1	30	2	30	2	32	1.5	30.75	8	Rock	High	1	582.863	821.836	205.459
160	2018	Clark Fork	NX	2	40	1	28	2	31	1	35	1.5	33.5	8	Rock	High	1	249.336	351.563	87.8908
161	2018	Clark Fork	NX	2	40	2	46	1	36	2	30	1.75	38	8	Rock	High	1	365.025	514.685	128.671
162	2018	Clark Fork	NX	1	40	2	40	1	30	2	30	1.5	35	8	Rock	High	1	595.815	840.099	210.025
163	2018	Clark Fork	NX	2	36	2	39	2	35	2	30	2	35	8	Rock	High	0	0	0	0
164	2018	Clark Fork	NX	1	40	2	40	2	40	1	30	1.5	37.5	8	Rock	High	1	603.371	850.753	212.688
165	2018	Clark Fork	NX	2	44	1	50	1	46	1	50	1.25	47.5	8	Rock	High	1	150.131	211.685	52.9213

## Sheet: Data by burrow
Run ID	Experiment Year	River	Population	Sex	Size	Sex	Size	Sex	Size	Sex	Size	MeanSex	MeanSize	Shelter	Density	End Mass	EndDepth	EndHeight	EndWidth	TimeTo70	TimeToComplete
15	2018	Gaddesby	IEB	2	51							2	51	Silt	Low	929.754	240	50	70	12	60
2	2018	Gaddesby	IEB	2	54							2	54	None	Low	54.7891	55	30	30	36	84
3	2018	Gaddesby	IEB	2	47							2	47	None	Low	438.313	110	60	60	36	36
29	2018	Gaddesby	IEB	2	51	1	49	1	41	2	50	1.5	47.75	None	High	49.8083	50	30	30		12
22	2018	Gaddesby	IEB	2	47	1	43					1.5	45	None	Medium	304.384	100	50	55	12	12
23	2018	Gaddesby	IEB	2	44	2	49					2	46.5	None	Medium	157.726	95	20	75	12	12
24	2018	Gaddesby	IEB	2	41	1	46					1.5	43.5	None	Medium	119.54	90	40	30	12	12
24	2018	Gaddesby	IEB	2	41	1	46					1.5	43.5	None	Medium	99.6165	100	30	30	12	12
36	2018	Gaddesby	IEB	2	53	2	51					2	52	Rock	Medium	323.754	90	50	65	60	60
37	2018	Gaddesby	IEB	2	54	1	47					1.5	50.5	Rock	Medium	221.37	100	40	50
43	2018	Gaddesby	IEB	2	40	2	44	1	50	2	47	1.75	45.25	Rock	High	283.907	95	60	45	36	60
43	2018	Gaddesby	IEB	2	40	2	44	1	50	2	47	1.75	45.25	Rock	High	582.757	130	90	45	36	60
43	2018	Gaddesby	IEB	2	40	2	44	1	50	2	47	1.75	45.25	Rock	High	79.6932	60	40	30		36
44	2018	Gaddesby	IEB	1	53	1	56	2	51	2	49	1.5	52.25	Rock	High	149.425	90	50	30	36	36
44	2018	Gaddesby	IEB	1	53	1	56	2	51	2	49	1.5	52.25	Rock	High	203.66	115	40	40	84	84
40	2018	Gaddesby	IEB	2	51	2	40					2	45.5	Rock	Medium	265.644	100	40	60
41	2018	Gaddesby	IEB	1	50	1	48					1	49	Rock	Medium	249.041	90	50	50	96	96
45	2019	Gaddesby	IEB	1	54	2	56	1	43	1	57	1.25	52.5	Rock	High	1355.89	250	70	70	12	60
46	2019	Gaddesby	IEB	2	46	2	46	1	41	2	51	1.75	46	Rock	High	553.425	200	50	50	36	36
48	2019	Gaddesby	IEB	2	47	2	51	1	43	1	43	1.5	46	Rock	High	503.617	200	35	65	36	36
31	2019	Gaddesby	IEB	1	59	2	52	2	46	1	43	1.5	50	None	High	210.302	95	50	40	12	60
31	2019	Gaddesby	IEB	1	59	2	52	2	46	1	43	1.5	50	None	High	307.151	185	50	30	60	60
31	2019	Gaddesby	IEB	1	59	2	52	2	46	1	43	1.5	50	None	High	517.452
33	2019	Gaddesby	IEB	2	46	1	68	1	53	1	45	1.25	53	None	High	398.466	200	40	45	12	60
72	2018	Etherow	IEX	2	48	1	51					1.5	49.5	None	Medium	387.397	100	70	50	60	60
72	2018	Etherow	IEX	2	48	1	51					1.5	49.5	None	Medium	92.9754	70	40	30	60	70
73	2018	Etherow	IEX	1	43	1	41					1	42	None	Medium	287.781	130	50	40	60	60
73	2018	Etherow	IEX	1	43	1	41					1	42	None	Medium	92.9754	70	40	30	72	72
86	2018	Etherow	IEX	1	60	2	48					1.5	54	Rock	Medium	199.233	150	40	30	36	36
87	2018	Etherow	IEX	1	63	1	55					1	59	Rock	Medium	219.156	110	60	30	36	36
87	2018	Etherow	IEX	1	63	1	55					1	59	Rock	Medium	213.069	70	55	50	60	60
88	2018	Etherow	IEX	1	42	1	37					1	39.5	Rock	Medium	242.815	75	45	65	84	84
88	2018	Etherow	IEX	1	42	1	37					1	39.5	Rock	Medium	210.025	115	55	30	84	84
50	2018	Etherow	IEX	2	56							2	56	None	Low	650.828	140	60	70	60	60
50	2018	Etherow	IEX	2	56							2	56	None	Low	1248.53	235	60	80	84	84
51	2018	Etherow	IEX	1	57							1	57	None	Low	1673.56	210	90	80	60	60
53	2018	Etherow	IEX	1	65							1	65	None	Low	265.644	100	60	40	84	84
55	2018	Etherow	IEX	1	53							1	53	None	Low	451.595	85	60	80	12	12
93	2019	Etherow	IEX	2	45	2	47	2	42	2	44	2	44.5	Rock	High	270.21	155	35	45	12	12
93	2019	Etherow	IEX	2	45	2	47	2	42	2	44	2	44.5	Rock	High	189.271	95	40	45	12	12
94	2019	Etherow	IEX	2	46	1	51	2	44	2	44	1.75	46.25	Rock	High	647.507	200	45	65	36	36
95	2019	Etherow	IEX	2	43	2	43	2	51	2	47	2	46	Rock	High	1084.71	200	70	70	12	12
95	2019	Etherow	IEX	2	43	2	43	2	51	2	47	2	46	Rock	High	1079.18	200	75	65	36	36
96	2019	Etherow	IEX	2	47	2	51	2	53	2	43	2	48.5	Rock	High	309.918	200	35	40	12	36
96	2019	Etherow	IEX	2	47	2	51	2	53	2	43	2	48.5	Rock	High	61.0151	45	35	35	60	60
96	2019	Etherow	IEX	2	47	2	51	2	53	2	43	2	48.5	Rock	High	116.219	75	40	35	72	72
97	2019	Etherow	IEX	2	65	2	44	2	53	2	48	2	52.5	Rock	High	1411.23	200	75	85	36	36
98	2019	Etherow	IEX	2	41	2	44	2	45	1	53	1.75	45.75	Rock	High	309.918	200	35	40	36	36
98	2019	Etherow	IEX	2	41	2	44	2	45	1	53	1.75	45.75	Rock	High	348.658	200	35	45	36	36
98	2019	Etherow	IEX	2	41	2	44	2	45	1	53	1.75	45.75	Rock	High	87.1644	75	35	30	60	60
76	2019	Etherow	IEX	2	43	2	43					2	43	None	Medium	149.425	75	45	40	60	60
89	2019	Etherow	IEX	2	47	2	59					2	53	Rock	Medium	309.918	200	35	40	36	36
89	2019	Etherow	IEX	2	47	2	59					2	53	Rock	Medium	426.137	200	55	35	60	60
89	2019	Etherow	IEX	2	47	2	59					2	53	Rock	Medium	165.612	95	45	35	60	60
90	2019	Etherow	IEX	2	47	2	38					2	42.5	Rock	Medium	1022.73	120	70	110	12	60
90	2019	Etherow	IEX	2	47	2	38					2	42.5	Rock	Medium	131.715	85	35	40	60	60
79	2019	Etherow	IEX	1	52	2	52	1	59	2	54	1.5	54.25	None	High	534.609
80	2019	Etherow	IEX	2	45	2	44	1	48	2	42	1.75	44.75	None	High	531.288	200	60	40	36	60
81	2019	Etherow	IEX	2	43	2	54	2	44	2	41	2	45.5	None	High	657.469	180	60	55	12	36
81	2019	Etherow	IEX	2	43	2	54	2	44	2	41	2	45.5	None	High	3108.03	180	120	130	12	36
81	2019	Etherow	IEX	2	43	2	54	2	44	2	41	2	45.5	None	High	365.26	200	30	55	36	36
82	2019	Etherow	IEX	1	54	2	53	2	51	2	54	1.75	53	None	High	531.288	200	60	40	36	60
82	2019	Etherow	IEX	1	54	2	53	2	51	2	54	1.75	53	None	High	309.918	140	40	50	36	36
69	2019	Etherow	IEX	1	39							1	39	Silt	Low	292.208	220	40	30	60	84
83	2019	Etherow	IEX	2	54	2	41	2	54	2	47	2	49	None	High	1708.42	315	70	70	12	36
84	2019	Etherow	IEX	1	56	2	53	2	47	2	46	1.75	50.5	None	High	448.274	90	90	50	36	36
109	2018	Gallatin	IRX	1	53.2							1	53.2	Rock	Low	375.914	95	55	65	12	12
99	2018	Gallatin	IRX	1	41.9							1	41.9	None	Low	845.357	235	65	50	60	60
100	2018	Gallatin	IRX	1	39.8							1	39.8	None	Low	972.506	355	45	55	12	36
101	2018	Gallatin	IRX	1	44.3							1	44.3	None	Low	1510.85	455	50	60	12	84
101	2018	Gallatin	IRX	1	44.3							1	44.3	None	Low	409.534	185	50	40	60	60
102	2018	Gallatin	IRX	1	59.6							1	59.6	None	Low	747.124	225	60	50	12	12
103	2018	Gallatin	IRX	1	56.4							1	56.4	None	Low	946.357	75	95	120	36	36
104	2018	Gallatin	IRX	1	44.3							1	44.3	None	Low	1554.02	390	80	45	12	36
118	2018	Gallatin	IRX	2	36	1	29					1.5	32.5	Rock	Medium	1063.41	305	45	70	36	84
118	2018	Gallatin	IRX	2	36	1	29					1.5	32.5	Rock	Medium	229.118	115	45	40	84	84
113	2018	Gallatin	IRX	1	43							1	43	Silt	Low	2241.09	445	65	70	12	60
114	2018	Gallatin	IRX	1	44							1	44	Silt	Low	1881.64	680	50	50	12	60
115	2018	Gallatin	IRX	2	36							2	36	Silt	Low	126.181	95	30	40	12	12
116	2018	Gallatin	IRX	2	28							2	28	Silt	Low	1327.11	545	55	40	12	36
152	2018	Clark Fork	NX	1	43.3	1	43.8					1	43.55	Rock	Medium	1524.13	340	90	45	60	60
153	2018	Clark Fork	NX	2	39.1	2	36					2	37.55	Rock	Medium	75.5425	65	30	35		84
142	2018	Clark Fork	NX	2	39.4	2	37.8					2	38.6	None	Medium	529.628	145	60	55	60	60
143	2018	Clark Fork	NX	1	39.2	1	39.8					1	39.5	None	Medium	197.573	85	35	60	84	84
121	2018	Clark Fork	NX	2	38.8							2	38.8	None	Low	584.417	220	60	40	36	36
123	2018	Clark Fork	NX	1	48.2							1	48.2	None	Low	310.471	85	55	60	60	60
144	2018	Clark Fork	NX	2	36.3	2	37.4					2	36.85	None	Medium	575.285	210	55	45	60	60
136	2018	Clark Fork	NX	2	45.2							2	45.2	Silt	Low	522.018	245	55	35	36	60
126	2018	Clark Fork	NX	1	39.1							1	39.1	None	Low	222.754	115	35	50	12	12
127	2018	Clark Fork	NX	2	39.2							2	39.2	None	Low	315.037	115	55	45	12	12
145	2018	Clark Fork	NX	2	35.3	2	38.9					2	37.1	None	Medium	149.425	75	40	45	12	12
146	2018	Clark Fork	NX	2	39.6	2	37.2					2	38.4	None	Medium	169.486	125	35	35	12	12
154	2018	Clark Fork	NX	2	41.9	2	38.7					2	40.3	Rock	Medium	639.759	80	85	85	36	36
156	2018	Clark Fork	NX	2	37.8	2	45					2	41.4	Rock	Medium	179.863	65	50	50		36
157	2018	Clark Fork	NX	2	30	2	31.9					2	30.95	Rock	Medium	47.3178	95	15	30	36	36
158	2018	Clark Fork	NX	1	30.2	1	31.9					1	31.05	Rock	Medium	159.386	160	30	30	60	60
147	2018	Clark Fork	NX	2	34	2	32					2	33	None	Medium	92.9754	140	20	30	60	60
148	2018	Clark Fork	NX	2	30	2	36					2	33	None	Medium	149.425	60	45	50	60	60
148	2018	Clark Fork	NX	2	30	2	36					2	33	None	Medium	796.932	200	60	60	60	84
159	2018	Clark Fork	NX	1	31	1	30	2	30	2	32	1.5	30.75	Rock	High	821.836	75	110	90	36	36
160	2018	Clark Fork	NX	2	40	1	28	2	31	1	35	1.5	33.5	Rock	High	351.563	165	35	55	36	84
161	2018	Clark Fork	NX	2	40	2	46	1	36	2	30	1.75	38	Rock	High	514.685	155	50	60	36	36
162	2018	Clark Fork	NX	1	40	2	40	1	30	2	30	1.5	35	Rock	High	840.099	230	55	60	60	60
164	2018	Clark Fork	NX	1	40	2	40	2	40	1	30	1.5	37.5	Rock	High	850.753	215	55	65	48	48
165	2018	Clark Fork	NX	2	44	1	50	1	46	1	50	1.25	47.5	Rock	High	211.685	85	45	50	36	36
149	2018	Clark Fork	NX	2	46	1	34	1	36	2	34	1.5	37.5	None	High	149.425	135	25	40	36	60
149	2018	Clark Fork	NX	2	46	1	34	1	36	2	34	1.5	37.5	None	High	365.26	330	25	40	36	60
151	2018	Clark Fork	NX	1	30	2	32	1	30	2	30	1.5	30.5	None	High	411.748	155	60	40	12	36

## Sheet: Burrow construction over time
Run ID	Experiment Year	River	Population	C1Sex	C2Size	C2Sex	C2Size	C3Sex	C3Size	C4Sex	C4Size	MeanSex	MeanSize	Shelter	Density	V0	V12	V24	V36	V48	V60	V72	V84	V96	M0	M12	M24	M36	M48	M60	M72	M84	M96	Night	Day	LogNight	LogDay	Depth	Eheight	Ewidth	TimeTo70	TimeToComplete
15	2018	Gaddesby	IEB	2	51							2	51	Silt	Low	0	0	0	0	412.125	412.125	659.4	659.4	659.4	0	0	0	0	581.096	581.096	929.754	929.754	929.754	929.754	0	2.96883	0	240	50	70	12	60
2	2018	Gaddesby	IEB	2	54							2	54	None	Low	0	0	0	0	0	0	0	0	38.8575	0	0	0	0	0	0	0	0	54.7891	54.7891	0	1.74655	0	55	30	30	36	84
3	2018	Gaddesby	IEB	2	47							2	47	None	Low	0	0	0	0	310.86	310.86	310.86	310.86	310.86	0	0	0	0	438.313	438.313	438.313	438.313	438.313	438.313	0	2.64277	0	110	60	60	36	36
29	2018	Gaddesby	IEB	2	51	1	49	1	41	2	50	1.5	47.75	None	High	0	0	35.325	35.325	35.325	35.325	35.325	35.325	35.325	0	0	49.8083	49.8083	49.8083	49.8083	49.8083	49.8083	49.8083	49.8083	0	1.70593	0	50	30	30		12
22	2018	Gaddesby	IEB	2	47	1	43					1.5	45	None	Medium	0	0	215.875	215.875	215.875	215.875	215.875	215.875	215.875	0	0	304.384	304.384	304.384	304.384	304.384	304.384	304.384	304.384	0	2.48485	0	100	50	55	12	12
23	2018	Gaddesby	IEB	2	44	2	49					2	46.5	None	Medium	0	0	111.862	111.862	111.862	111.862	111.862	111.862	111.862	0	0	157.726	157.726	157.726	157.726	157.726	157.726	157.726	157.726	0	2.20065	0	95	20	75	12	12
24	2018	Gaddesby	IEB	2	41	1	46					1.5	43.5	None	Medium	0	0	84.78	84.78	84.78	84.78	84.78	84.78	84.78	0	0	119.54	119.54	119.54	119.54	119.54	119.54	119.54	119.54	0	2.08113	0	90	40	30	12	12
24	2018	Gaddesby	IEB	2	41	1	46					1.5	43.5	None	Medium	0	0	70.65	70.65	70.65	70.65	70.65	70.65	70.65	0	0	99.6165	99.6165	99.6165	99.6165	99.6165	99.6165	99.6165	99.6165	0	2.00267	0	100	30	30	12	12
36	2018	Gaddesby	IEB	2	53	2	51					2	52	Rock	Medium	0	0	0	0	0	0	229.613	229.613	229.613	0	0	0	0	0	0	323.754	323.754	323.754	323.754	0	2.51155	0	90	50	65	60	60
37	2018	Gaddesby	IEB	2	54	1	47					1.5	50.5	Rock	Medium	0	0	0	0	0	0	0	0	157	0	0	0	0	0	0	0	0	221.37	221.37	0	2.34708	0	100	40	50
43	2018	Gaddesby	IEB	2	40	2	44	1	50	2	47	1.75	45.25	Rock	High	0	0	0	0	65.94	65.94	201.352	201.352	201.352	0	0	0	0	92.9754	92.9754	283.907	283.907	283.907	283.907	0	2.4547	0	95	60	45	36	60
43	2018	Gaddesby	IEB	2	40	2	44	1	50	2	47	1.75	45.25	Rock	High	0	0	0	0	94.2	94.2	413.303	413.303	413.303	0	0	0	0	132.822	132.822	582.757	582.757	582.757	582.757	0	2.76623	0	130	90	45	36	60
43	2018	Gaddesby	IEB	2	40	2	44	1	50	2	47	1.75	45.25	Rock	High	0	0	0	0	56.52	56.52	56.52	56.52	56.52	0	0	0	0	79.6932	79.6932	79.6932	79.6932	79.6932	79.6932	0	1.90684	0	60	40	30		36
44	2018	Gaddesby	IEB	1	53	1	56	2	51	2	49	1.5	52.25	Rock	High	0	0	0	0	105.975	105.975	105.975	105.975	105.975	0	0	0	0	149.425	149.425	149.425	149.425	149.425	149.425	0	2.17732	0	90	50	30	36	36
44	2018	Gaddesby	IEB	1	53	1	56	2	51	2	49	1.5	52.25	Rock	High	0	0	0	0	0	0	0	0	144.44	0	0	0	0	0	0	0	0	203.66	203.66	0	2.31103	0	115	40	40	84	84
40	2018	Gaddesby	IEB	2	51	2	40					2	45.5	Rock	Medium	0	0	0	0	0	0	0	0	188.4	0	0	0	0	0	0	0	0	265.644	265.644	0	2.42593	0	100	40	60
41	2018	Gaddesby	IEB	1	50	1	48					1	49	Rock	Medium	0	0	0	0	0	0	0	176.625	176.625	0	0	0	0	0	0	0	249.041	249.041	0	249.041	0	2.39801	90	50	50	96	96
45	2019	Gaddesby	IEB	1	54	2	56	1	43	1	57	1.25	52.5	Rock	High	0	0	423.115	423.115	423.115	423.115	961.625	961.625	961.625	0	0	596.592	596.592	596.592	596.592	1355.89	1355.89	1355.89	1355.89	0	3.13255	0	250	70	70	12	60
46	2019	Gaddesby	IEB	2	46	2	46	1	41	2	51	1.75	46	Rock	High	0	0	0	0	392.5	392.5	392.5	392.5	392.5	0	0	0	0	553.425	553.425	553.425	553.425	553.425	553.425	0	2.74384	0	200	50	50	36	36
48	2019	Gaddesby	IEB	2	47	2	51	1	43	1	43	1.5	46	Rock	High	0	0	0	0	357.175	357.175	357.175	357.175	357.175	0	0	0	0	503.617	503.617	503.617	503.617	503.617	503.617	0	2.70296	0	200	35	65	36	36
31	2019	Gaddesby	IEB	1	59	2	52	2	46	1	43	1.5	50	None	High	0	0	120.105	120.105	120.105	120.105	149.15	149.15	149.15	0	0	169.348	169.348	169.348	169.348	210.302	210.302	210.302	210.302	0	2.3249	0	95	50	40	12	60
31	2019	Gaddesby	IEB	1	59	2	52	2	46	1	43	1.5	50	None	High	0	0	0	0	0	0	217.838	217.838	217.838	0	0	0	0	0	0	307.151	307.151	307.151	307.151	0	2.48876	0	185	50	30	60	60
31	2019	Gaddesby	IEB	1	59	2	52	2	46	1	43	1.5	50	None	High	0	0	120.105	120.105	120.105	120.105	366.988	366.988	366.988	0	0	169.348	169.348	169.348	169.348	517.452	517.452	517.452	517.452	0	2.71471	0
33	2019	Gaddesby	IEB	2	46	1	68	1	53	1	45	1.25	53	None	High	0	0	192.325	192.325	192.325	192.325	282.6	219.8	282.6	0	0	271.178	271.178	271.178	271.178	398.466	398.466	398.466	398.466	0	2.60148	0	200	40	45	12	60
72	2018	Etherow	IEX	2	48	1	51					1.5	49.5	None	Medium	0	0	0	0	0	0	274.75	274.75	274.75	0	0	0	0	0	0	387.397	387.397	387.397	387.397	0	2.58928	0	100	70	50	60	60
72	2018	Etherow	IEX	2	48	1	51					1.5	49.5	None	Medium	0	0	0	0	0	0	65.94	65.94	65.94	0	0	0	0	0	0	92.9754	92.9754	92.9754	92.9754	0	1.97301	0	70	40	30	60	70
73	2018	Etherow	IEX	1	43	1	41					1	42	None	Medium	0	0	62.8	62.8	62.8	62.8	204.1	204.1	204.1	0	0	88.548	88.548	88.548	88.548	287.781	287.781	287.781	287.781	0	2.46057	0	130	50	40	60	60
73	2018	Etherow	IEX	1	43	1	41					1	42	None	Medium	0	0	0	0	0	0	0	65.94	65.94	0	0	0	0	0	0	0	92.9754	92.9754	0	92.9754	0	1.97301	70	40	30	72	72
86	2018	Etherow	IEX	1	60	2	48					1.5	54	Rock	Medium	0	0	0	0	141.3	141.3	141.3	141.3	141.3	0	0	0	0	199.233	199.233	199.233	199.233	199.233	199.233	0	2.30154	0	150	40	30	36	36
87	2018	Etherow	IEX	1	63	1	55					1	59	Rock	Medium	0	0	0	0	155.43	155.43	155.43	155.43	155.43	0	0	0	0	219.156	219.156	219.156	219.156	219.156	219.156	0	2.34273	0	110	60	30	36	36
87	2018	Etherow	IEX	1	63	1	55					1	59	Rock	Medium	0	0	0	0	0	0	151.113	151.113	151.113	0	0	0	0	0	0	213.069	213.069	213.069	213.069	0	2.33055	0	70	55	50	60	60
88	2018	Etherow	IEX	1	42	1	37					1	39.5	Rock	Medium	0	0	0	0	0	0	0	0	172.209	0	0	0	0	0	0	0	0	242.815	242.815	0	2.38706	0	75	45	65	84	84
88	2018	Etherow	IEX	1	42	1	37					1	39.5	Rock	Medium	0	0	0	0	0	0	0	0	148.954	0	0	0	0	0	0	0	0	210.025	210.025	0	2.32433	0	115	55	30	84	84
50	2018	Etherow	IEX	2	56							2	56	None	Low	0	0	0	0	0	0	461.58	461.58	461.58	0	0	0	0	0	0	650.828	650.828	650.828	650.828	0	2.81413	0	140	60	70	60	60
50	2018	Etherow	IEX	2	56							2	56	None	Low	0	0	0	0	0	0	0	0	885.48	0	0	0	0	0	0	0	0	1248.53	1248.53	0	3.09675	0	235	60	80	84	84
51	2018	Etherow	IEX	1	57							1	57	None	Low	0	0	0	0	0	0	1186.92	1186.92	1186.92	0	0	0	0	0	0	1673.56	1673.56	1673.56	1673.56	0	3.2239	0	210	90	80	60	60
53	2018	Etherow	IEX	1	65							1	65	None	Low	0	0	0	0	0	0	0	0	188.4	0	0	0	0	0	0	0	0	265.644	265.644	0	2.42593	0	100	60	40	84	84
55	2018	Etherow	IEX	1	53							1	53	None	Low	0	0	320.28	320.28	320.28	320.28	320.28	320.28	320.28	0	0	451.595	451.595	451.595	451.595	451.595	451.595	451.595	451.595	0	2.65571	0	85	60	80	12	12
93	2019	Etherow	IEX	2	45	2	47	2	42	2	44	2	44.5	Rock	High	0	0	191.638	191.638	191.638	191.638	191.638	191.638	191.638	0	0	270.21	270.21	270.21	270.21	270.21	270.21	270.21	270.21	0	2.43331	0	155	35	45	12	12
93	2019	Etherow	IEX	2	45	2	47	2	42	2	44	2	44.5	Rock	High	0	0	134.235	134.235	134.235	134.235	134.235	134.235	134.235	0	0	189.271	189.271	189.271	189.271	189.271	189.271	189.271	189.271	0	2.27937	0	95	40	45	12	12
94	2019	Etherow	IEX	2	46	1	51	2	44	2	44	1.75	46.25	Rock	High	0	0	0	0	218.132	218.132	459.225	459.225	459.225	0	0	0	0	307.566	307.566	647.507	647.507	647.507	647.507	0	2.81191	0	200	45	65	36	36
95	2019	Etherow	IEX	2	43	2	43	2	51	2	47	2	46	Rock	High	0	0	769.3	769.3	769.3	769.3	769.3	769.3	769.3	0	0	1084.71	1084.71	1084.71	1084.71	1084.71	1084.71	1084.71	1084.71	0	3.03572	0	200	70	70	12	12
95	2019	Etherow	IEX	2	43	2	43	2	51	2	47	2	46	Rock	High	0	0	0	0	765.375	765.375	765.375	765.375	765.375	0	0	0	0	1079.18	1079.18	1079.18	1079.18	1079.18	1079.18	0	3.0335	0	200	75	65	36	36
96	2019	Etherow	IEX	2	47	2	51	2	53	2	43	2	48.5	Rock	High	0	0	82.425	82.425	219.8	219.8	219.8	219.8	219.8	0	0	116.219	116.219	309.918	309.918	309.918	309.918	309.918	309.918	0	2.49265	0	200	35	40	12	36
96	2019	Etherow	IEX	2	47	2	51	2	53	2	43	2	48.5	Rock	High	0	0	0	0	0	0	43.2731	43.2731	43.2731	0	0	0	0	0	0	61.0151	61.0151	61.0151	61.0151	0	1.7925	0	45	35	35	60	60
96	2019	Etherow	IEX	2	47	2	51	2	53	2	43	2	48.5	Rock	High	0	0	0	0	0	0	82.425	82.425	82.425	0	0	0	0	0	0	116.219	116.219	116.219	116.219	0	2.069	0	75	40	35	72	72
97	2019	Etherow	IEX	2	65	2	44	2	53	2	48	2	52.5	Rock	High	0	0	0	0	1000.88	1000.88	1000.88	1000.88	1000.88	0	0	0	0	1411.23	1411.23	1411.23	1411.23	1411.23	1411.23	0	3.14991	0	200	75	85	36	36
98	2019	Etherow	IEX	2	41	2	44	2	45	1	53	1.75	45.75	Rock	High	0	0	0	0	219.8	219.8	219.8	219.8	219.8	0	0	0	0	309.918	309.918	309.918	309.918	309.918	309.918	0	2.49265	0	200	35	40	36	36
98	2019	Etherow	IEX	2	41	2	44	2	45	1	53	1.75	45.75	Rock	High	0	0	0	0	247.275	247.275	247.275	247.275	247.275	0	0	0	0	348.658	348.658	348.658	348.658	348.658	348.658	0	2.54364	0	200	35	45	36	36
98	2019	Etherow	IEX	2	41	2	44	2	45	1	53	1.75	45.75	Rock	High	0	0	0	0	0	0	61.8188	61.8188	61.8188	0	0	0	0	0	0	87.1644	87.1644	87.1644	87.1644	0	1.94529	0	75	35	30	60	60
76	2019	Etherow	IEX	2	43	2	43					2	43	None	Medium	0	0	0	0	0	0	105.975	105.975	105.975	0	0	0	0	0	0	149.425	149.425	149.425	149.425	0	2.17732	0	75	45	40	60	60
89	2019	Etherow	IEX	2	47	2	59					2	53	Rock	Medium	0	0	0	0	192.325	192.325	219.8	219.8	219.8	0	0	0	0	271.178	271.178	309.918	309.918	309.918	309.918	0	2.49265	0	200	35	40	36	36
89	2019	Etherow	IEX	2	47	2	59					2	53	Rock	Medium	0	0	0	0	0	0	302.225	302.225	302.225	0	0	0	0	0	0	426.137	426.137	426.137	426.137	0	2.63057	0	200	55	35	60	60
89	2019	Etherow	IEX	2	47	2	59					2	53	Rock	Medium	0	0	0	0	0	0	117.456	117.456	117.456	0	0	0	0	0	0	165.612	165.612	165.612	165.612	0	2.22171	0	95	45	35	60	60
90	2019	Etherow	IEX	2	47	2	38					2	42.5	Rock	Medium	0	0	453.337	453.337	453.337	453.337	725.34	725.34	725.34	0	0	639.206	639.206	639.206	639.206	1022.73	1022.73	1022.73	1022.73	0	3.01019	0	120	70	110	12	60
90	2019	Etherow	IEX	2	47	2	38					2	42.5	Rock	Medium	0	0	0	0	0	0	93.415	93.415	93.415	0	0	0	0	0	0	131.715	131.715	131.715	131.715	0	2.12292	0	85	35	40	60	60
79	2019	Etherow	IEX	1	52	2	52	1	59	2	54	1.5	54.25	None	High	0	0	0	0	0	0	379.155	379.155	379.155	0	0	0	0	0	0	534.609	534.609	534.609	534.609	0	2.72885	0
80	2019	Etherow	IEX	2	45	2	44	1	48	2	42	1.75	44.75	None	High	0	0	55.6369	55.6369	222.548	222.548	376.8	376.8	376.8	0	0	78.448	78.448	313.792	313.792	531.288	531.288	531.288	531.288	0	2.72615	0	200	60	40	36	60
81	2019	Etherow	IEX	2	43	2	54	2	44	2	41	2	45.5	None	High	0	0	181.335	181.335	466.29	466.29	466.29	466.29	466.29	0	0	255.682	255.682	657.469	657.469	657.469	657.469	657.469	657.469	0	2.81854	0	180	60	55	12	36
81	2019	Etherow	IEX	2	43	2	54	2	44	2	41	2	45.5	None	High	0	0	1408.29	1408.29	2204.28	2204.28	2204.28	2204.28	2204.28	0	0	1985.69	1985.69	3108.03	3108.03	3108.03	3108.03	3108.03	3108.03	0	3.49263	0	180	120	130	12	36
81	2019	Etherow	IEX	2	43	2	54	2	44	2	41	2	45.5	None	High	0	0	0	0	259.05	259.05	259.05	259.05	259.05	0	0	0	0	365.26	365.26	365.26	365.26	365.26	365.26	0	2.56379	0	200	30	55	36	36
82	2019	Etherow	IEX	1	54	2	53	2	51	2	54	1.75	53	None	High	0	0	103.62	103.62	207.24	207.24	376.8	376.8	376.8	0	0	146.104	146.104	292.208	292.208	531.288	531.288	531.288	531.288	0	2.72615	0	200	60	40	36	60
82	2019	Etherow	IEX	1	54	2	53	2	51	2	54	1.75	53	None	High	0	0	0	0	219.8	219.8	219.8	219.8	219.8	0	0	0	0	309.918	309.918	309.918	309.918	309.918	309.918	0	2.49265	0	140	40	50	36	36
69	2019	Etherow	IEX	1	39							1	39	Silt	Low	0	0	0	0	0	0	56.52	56.52	207.24	0	0	0	0	0	0	79.6932	79.6932	292.208	292.208	0	2.46718	0	220	40	30	60	84
83	2019	Etherow	IEX	2	54	2	41	2	54	2	47	2	49	None	High	0	0	346.185	346.185	480.812	480.812	480.812	480.812	1211.65	0	0	488.121	488.121	677.946	677.946	677.946	677.946	1708.42	1708.42	0	3.23285	0	315	70	70	12	36
84	2019	Etherow	IEX	1	56	2	53	2	47	2	46	1.75	50.5	None	High	0	0	0	0	103.031	103.031	103.031	103.031	317.925	0	0	0	0	145.274	145.274	145.274	145.274	448.274	448.274	0	2.65251	0	90	90	50	36	36
109	2018	Gallatin	IRX	1	53.2							1	53.2	Rock	Low	0	0	193.895	193.895	193.895	193.895	193.895	193.895	266.606	0	0	273.392	273.392	273.392	273.392	273.392	273.392	375.914	375.914	0	2.57624	0	95	55	65	12	12
99	2018	Gallatin	IRX	1	41.9							1	41.9	None	Low	0	0	0	0	0	0	599.544	599.544	599.544	0	0	0	0	0	0	845.357	845.357	845.357	845.357	0	2.92755	0	235	65	50	60	60
100	2018	Gallatin	IRX	1	39.8							1	39.8	None	Low	0	0	117.456	117.456	438.913	438.913	438.913	438.913	689.721	0	0	165.612	165.612	618.868	618.868	618.868	618.868	972.506	972.506	0	2.98834	0	355	45	55	12	36
101	2018	Gallatin	IRX	1	44.3							1	44.3	None	Low	0	0	274.75	274.75	434.105	434.105	930.225	930.225	1071.53	0	0	387.397	387.397	612.088	612.088	1311.62	1311.62	1510.85	1510.85	0	3.17951	0	455	50	60	12	84
101	2018	Gallatin	IRX	1	44.3							1	44.3	None	Low	0	0	0	0	0	0	290.45	290.45	290.45	0	0	0	0	0	0	409.534	409.534	409.534	409.534	0	2.61335	0	185	50	40	60	60
102	2018	Gallatin	IRX	1	59.6							1	59.6	None	Low	0	0	529.875	529.875	529.875	529.875	529.875	529.875	529.875	0	0	747.124	747.124	747.124	747.124	747.124	747.124	747.124	747.124	0	2.87397	0	225	60	50	12	12
103	2018	Gallatin	IRX	1	56.4							1	56.4	None	Low	0	0	0	0	671.175	671.175	671.175	671.175	671.175	0	0	0	0	946.357	946.357	946.357	946.357	946.357	946.357	0	2.97651	0	75	95	120	36	36
104	2018	Gallatin	IRX	1	44.3							1	44.3	None	Low	0	0	395.64	395.64	1102.14	1102.14	1102.14	1102.14	1102.14	0	0	557.852	557.852	1554.02	1554.02	1554.02	1554.02	1554.02	1554.02	0	3.19174	0	390	80	45	12	36
118	2018	Gallatin	IRX	2	36	1	29					1.5	32.5	Rock	Medium	0	0	0	0	420.368	420.368	680.006	680.006	754.189	0	0	0	0	592.718	592.718	958.809	958.809	1063.41	1063.41	0	3.02711	0	305	45	70	36	84
118	2018	Gallatin	IRX	2	36	1	29					1.5	32.5	Rock	Medium	0	0	0	0	0	0	0		162.495	0	0	0	0	0	0	0	0	229.118	229.118	0	2.36195	0	115	45	40	84	84
113	2018	Gallatin	IRX	1	43							1	43	Silt	Low	0	0	1000.88	1000.88	1084.28	1084.28	1589.43	1589.43	1589.43	0	0	1411.23	1411.23	1528.84	1528.84	2241.09	2241.09	2241.09	2241.09	0	3.35065	0	445	65	70	12	60
114	2018	Gallatin	IRX	1	44							1	44	Silt	Low	0	0	685.305	685.305	840.735	840.735	1334.5	1334.5	1334.5	0	0	966.28	966.28	1185.44	1185.44	1881.64	1881.64	1881.64	1881.64	0	3.27477	0	680	50	50	12	60
115	2018	Gallatin	IRX	2	36							2	36	Silt	Low	0	0	89.49	89.49	89.49	89.49	89.49	89.49	89.49	0	0	126.181	126.181	126.181	126.181	126.181	126.181	126.181	126.181	0	2.10442	0	95	30	40	12	12
116	2018	Gallatin	IRX	2	28							2	28	Silt	Low	0	0	854.865	854.865	941.215	941.215	941.215	941.215	941.215	0	0	1205.36	1205.36	1327.11	1327.11	1327.11	1327.11	1327.11	1327.11	0	3.12324	0	545	55	40	12	36
152	2018	Clark Fork	NX	1	43.3	1	43.8					1	43.55	Rock	Medium	0	0	0	0	0	0	1080.95	1080.95	1080.95	0	0	0	0	0	0	1524.13	1524.13	1524.13	1524.13	0	3.18331	0	340	90	45	60	60
153	2018	Clark Fork	NX	2	39.1	2	36					2	37.55	Rock	Medium	0	0	0	0	0	0	0	0	53.5763	0	0	0	0	0	0	0	0	75.5425	75.5425	0	1.8839	0	65	30	35		84
142	2018	Clark Fork	NX	2	39.4	2	37.8					2	38.6	None	Medium	0	0	0	0	0	0	323.812	323.812	375.623	0	0	0	0	0	0	456.576	456.576	529.628	529.628	0	2.72479	0	145	60	55	60	60
143	2018	Clark Fork	NX	1	39.2	1	39.8					1	39.5	None	Medium	0	0	0	0	0	0	0	0	140.123	0	0	0	0	0	0	0	0	197.573	197.573	0	2.29792	0	85	35	60	84	84
121	2018	Clark Fork	NX	2	38.8							2	38.8	None	Low	0	0	0	0	414.48	414.48	414.48	414.48	414.48	0	0	0	0	584.417	584.417	584.417	584.417	584.417	584.417	0	2.76747	0	220	60	40	36	36
123	2018	Clark Fork	NX	1	48.2							1	48.2	None	Low	0	0	0	0	0	0	220.193	220.193	220.193	0	0	0	0	0	0	310.471	310.471	310.471	310.471	0	2.49342	0	85	55	60	60	60
144	2018	Clark Fork	NX	2	36.3	2	37.4					2	36.85	None	Medium	0	0	0	0	0	0	378.861	378.861	408.004	0	0	0	0	0	0	534.193	534.193	575.285	575.285	0	2.76064	0	210	55	45	60	60
136	2018	Clark Fork	NX	2	45.2							2	45.2	Silt	Low	0	0	0	0	332.448	332.448	370.226	370.226	370.226	0	0	0	0	468.751	468.751	522.018	522.018	522.018	522.018	0	2.71852	0	245	55	35	36	60
126	2018	Clark Fork	NX	1	39.1							1	39.1	None	Low	0	0	157.981	157.981	157.981	157.981	157.981	157.981	157.981	0	0	222.754	222.754	222.754	222.754	222.754	222.754	222.754	222.754	0	2.34977	0	115	35	50	12	12
127	2018	Clark Fork	NX	2	39.2							2	39.2	None	Low	0	0	223.431	223.431	223.431	223.431	223.431	223.431	223.431	0	0	315.037	315.037	315.037	315.037	315.037	315.037	315.037	315.037	0	2.49974	0	115	55	45	12	12
145	2018	Clark Fork	NX	2	35.3	2	38.9					2	37.1	None	Medium	0	0	105.975	105.975	105.975	105.975	105.975	105.975	105.975	0	0	149.425	149.425	149.425	149.425	149.425	149.425	149.425	149.425	0	2.17732	0	75	40	45	12	12
146	2018	Clark Fork	NX	2	39.6	2	37.2					2	38.4	None	Medium	0	0	120.203	120.203	120.203	120.203	120.203	120.203	120.203	0	0	169.486	169.486	169.486	169.486	169.486	169.486	169.486	169.486	0	2.23169	0	125	35	35	12	12
154	2018	Clark Fork	NX	2	41.9	2	38.7					2	40.3	Rock	Medium	0	0	0	0	453.73	453.73	453.73	453.73	453.73	0	0	0	0	639.759	639.759	639.759	639.759	639.759	639.759	0	2.80669	0	80	85	85	36	36
156	2018	Clark Fork	NX	2	37.8	2	45					2	41.4	Rock	Medium	0	0	0	0	127.562	127.562	127.562	127.562	127.562	0	0	0	0	179.863	179.863	179.863	179.863	179.863	179.863	0	2.25735	0	65	50	50		36
157	2018	Clark Fork	NX	2	30	2	31.9					2	30.95	Rock	Medium	0	0	0	0	33.5588	33.5588	33.5588	33.5588	33.5588	0	0	0	0	47.3178	47.3178	47.3178	47.3178	47.3178	47.3178	0	1.68411	0	95	15	30	36	36
158	2018	Clark Fork	NX	1	30.2	1	31.9					1	31.05	Rock	Medium	0	0	0	0	0	0	77.715	77.715	113.04	0	0	0	0	0	0	109.578	109.578	159.386	159.386	0	2.20517	0	160	30	30	60	60
147	2018	Clark Fork	NX	2	34	2	32					2	33	None	Medium	0	0	0	0	0	0	65.94	65.94	65.94	0	0	0	0	0	0	92.9754	92.9754	92.9754	92.9754	0	1.97301	0	140	20	30	60	60
148	2018	Clark Fork	NX	2	30	2	36					2	33	None	Medium	0	0	0	0	69.08	69.08	105.975	105.975	105.975	0	0	0	0	97.4028	97.4028	149.425	149.425	149.425	149.425	0	2.17732	0	60	45	50	60	60
148	2018	Clark Fork	NX	2	30	2	36					2	33	None	Medium	0	0	0	0	0	0	368.067	368.067	565.2	0	0	0	0	0	0	518.974	518.974	796.932	796.932	0	2.90197	0	200	60	60	60	84
159	2018	Clark Fork	NX	1	31	1	30	2	30	2	32	1.5	30.75	Rock	High	0	0	0	0	582.863	582.863	582.863	582.863	582.863	0	0	0	0	821.836	821.836	821.836	821.836	821.836	821.836	0	2.91531	0	75	110	90	36	36
160	2018	Clark Fork	NX	2	40	1	28	2	31	1	35	1.5	33.5	Rock	High	0	0	0	0	117.75	117.75	122.656	122.656	249.336	0	0	0	0	166.028	166.028	172.945	172.945	351.563	351.563	0	2.54724	0	165	35	55	36	84
161	2018	Clark Fork	NX	2	40	2	46	1	36	2	30	1.75	38	Rock	High	0	0	0	0	96.1625	96.1625	115.395	115.395	365.025	0	0	0	0	135.589	135.589	162.707	162.707	514.685	514.685	0	2.71238	0	155	50	60	36	36
162	2018	Clark Fork	NX	1	40	2	40	1	30	2	30	1.5	35	Rock	High	0	0	0	0	0	0	365.614	365.614	595.815	0	0	0	0	0	0	515.515	515.515	840.099	840.099	0	2.92485	0	230	55	60	60	60
164	2018	Clark Fork	NX	1	40	2	40	2	40	1	30	1.5	37.5	Rock	High	0	0	0	0	0	603.371	603.371	603.371	603.371	0	0	0	0	0	850.753	850.753	850.753	850.753	0	850.753	0	2.93031	215	55	65	48	48
165	2018	Clark Fork	NX	2	44	1	50	1	46	1	50	1.25	47.5	Rock	High	0	0	0	0	150.131	150.131	150.131	150.131	150.131	0	0	0	0	211.685	211.685	211.685	211.685	211.685	211.685	0	2.32774	0	85	45	50	36	36
149	2018	Clark Fork	NX	2	46	1	34	1	36	2	34	1.5	37.5	None	High	0	0	47.1	47.1	66.725	66.725	105.975	105.975	105.975	0	0	66.411	66.411	94.0822	94.0822	149.425	149.425	149.425	149.425	0	2.17732	0	135	25	40	36	60
149	2018	Clark Fork	NX	2	46	1	34	1	36	2	34	1.5	37.5	None	High	0		39.25	39.25	231.575	231.575	259.05	259.05	259.05	0	0	55.3425	55.3425	326.521	326.521	365.26	365.26	365.26	365.26	0	2.56379	0	330	25	40	36	60
151	2018	Clark Fork	NX	1	30	2	32	1	30	2	30	1.5	30.5	None	High	0	0	235.5	235.5	292.02	292.02	292.02	292.02	292.02	0	0	332.055	332.055	411.748	411.748	411.748	411.748	411.748	411.748	0	2.61569	0	155	60	40	12	36
